# Supplementary material for: Critical role for the mediodorsal thalamus in permitting rapid reward-guided updating in stochastic reward environments
Source: eLife journal article supplement (doi:10.7554/elife.13588), 2016-05-02
Supplement: supp [file elife-13588-supp-v1.zip]

This image shows a blank, aged, cream-colored page, likely an endpaper or flyleaf of a book. The paper has a slightly textured appearance with some minor discoloration and creases, characteristic of old paper. A small tear or hole is visible near the top center. The left edge of the page shows the binding of the book.

This image shows a blank, aged, cream-colored page, likely an endpaper or flyleaf of a book. The paper has a slightly textured appearance with some minor discoloration and creases, characteristic of old paper. A small tear or hole is visible near the top edge. The left edge of the page shows the binding structure, including the stitching and the inner cover material.

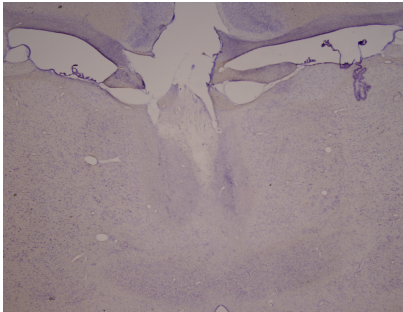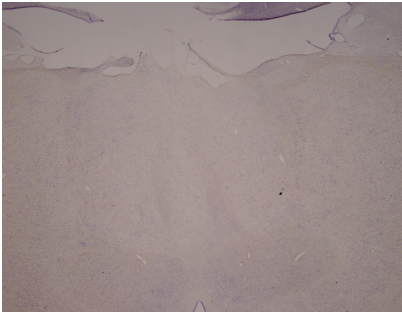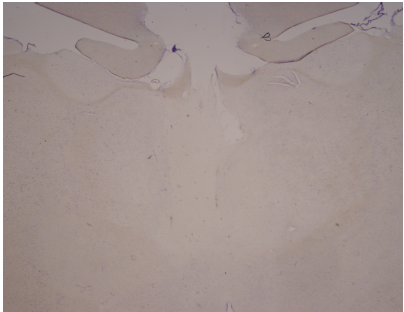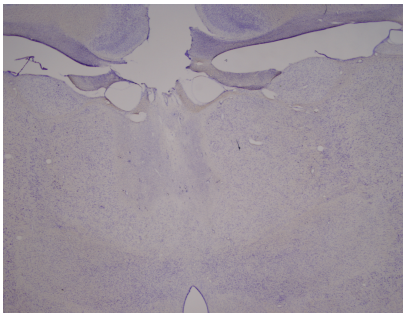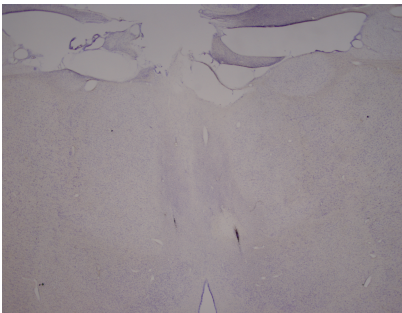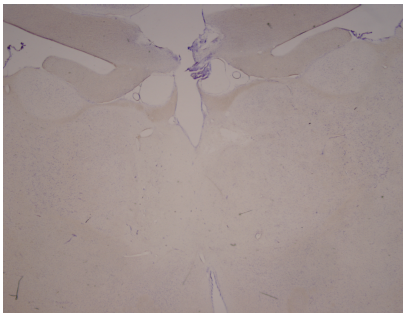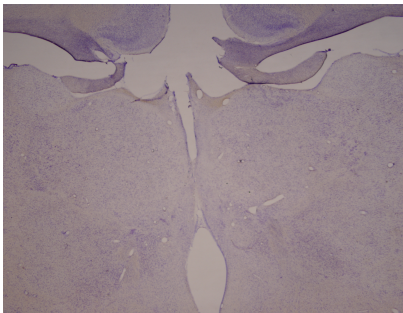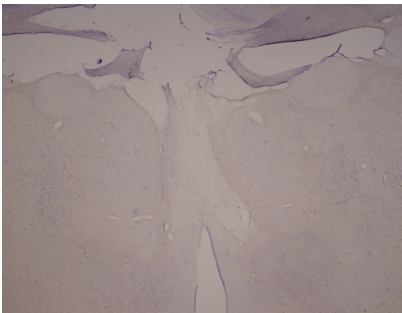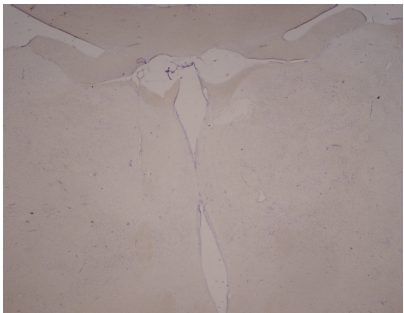

Anterior  
↓  
Posterior
